# Supplementary material for: Lack of Association between Antimyelin Antibodies and Progression to Multiple Sclerosis
Source: Atypon-hosted journal article supplement (doi:10.1056/nejmoa063602), 2007-01-25
Supplement: nejm_kuhle_371sa1.pdf [file nejm_kuhle_371sa1.pdf]

## Supplementary Appendix

This appendix has been provided by the authors to give readers additional information about their work.

Supplement to: Kuhle J, Pohl C, Mehling M, et al. Lack of association between antimyelin antibodies and progression to multiple sclerosis. *N Engl J Med* 2007;356:371-8.

## Web only Appendix

| <b>Supplemental Table 1. Hazard Ratios for the Development of Multiple Sclerosis According to the McDonald Criteria with Respect to IgM and IgG Antibody Status.*</b> |                              |                |                              |                |
|-----------------------------------------------------------------------------------------------------------------------------------------------------------------------|------------------------------|----------------|------------------------------|----------------|
| <b>Variable</b>                                                                                                                                                       | <b>IgM</b>                   |                | <b>IgG</b>                   |                |
|                                                                                                                                                                       | <b>Hazard Ratio (95% CI)</b> | <b>p-Value</b> | <b>Hazard Ratio (95% CI)</b> | <b>p-Value</b> |
| Antibody status                                                                                                                                                       |                              |                |                              |                |
| Negative for anti-MOG, negative for anti-MBP                                                                                                                          | 1.00                         |                | 1.00                         |                |
| Negative for anti-MOG, positive for anti-MBP                                                                                                                          | 0.76 (0.51–1.12)             | 0.17           | 1.27 (0.92–1.76)             | 0.15           |
| Positive for anti-MOG, negative for anti-MBP                                                                                                                          | 0.88 (0.67–1.16)             | 0.36           | 1.18 (0.87–1.61)             | 0.28           |
| Positive for anti-MOG, positive for anti-MBP                                                                                                                          | 1.02 (0.74–1.40)             | 0.92           | 0.82 (0.52–1.31)             | 0.41           |
| Female sex                                                                                                                                                            | 1.03 (0.81–1.31)             | 0.84           | 1.02 (0.80–1.30)             | 0.90           |
| Age at onset of disease (per year)                                                                                                                                    | 0.97 (0.96–0.99)             | <0.001         | 0.97 (0.96–0.99)             | <0.001         |
| IFNB-1b treatment                                                                                                                                                     | 0.53 (0.42–0.66)             | < 0.001        | 0.53 (0.42–0.67)             | < 0.001        |
| Steroid treatment of first event                                                                                                                                      | 1.46 (1.14–1.88)             | 0.003          | 1.44 (1.12–1.87)             | 0.005          |
| Multifocal presentation                                                                                                                                               | 1.05 (0.83–1.32)             | 0.69           | 1.03 (0.82–1.29)             | 0.82           |
| Number of lesions on T2-weighted MRI (per lesion)                                                                                                                     | 1.01 (1.01–1.02)             | < 0.001        | 1.01 (1.01–1.02)             | < 0.001        |
| Number of gadolinium-enhancing MRI lesions (per                                                                                                                       | 1.04 (1.01–1.07)             | 0.024          | 1.04 (1.01–1.07)             | 0.017          |

|         |  |  |
|---------|--|--|
| lesion) |  |  |
|---------|--|--|

\*Hazard ratios were calculated with the final Cox proportional hazards model. MOG denotes myelin oligodendrocyte glycoprotein, MBP myelin basic protein, and MRI magnetic resonance imaging.

| <b>Supplemental Table 2. Hazard Ratios for the Development of Clinically Definite Multiple Sclerosis According to IgM and IgG Antibody Status in different Patient Subgroups.*</b> |                              |                |                              |                |
|------------------------------------------------------------------------------------------------------------------------------------------------------------------------------------|------------------------------|----------------|------------------------------|----------------|
| <b>Variable</b>                                                                                                                                                                    | <b>IgM</b>                   |                | <b>IgG</b>                   |                |
|                                                                                                                                                                                    | <b>Hazard Ratio (95% CI)</b> | <b>p-Value</b> | <b>Hazard Ratio (95% CI)</b> | <b>p-Value</b> |
| <b>Patients with positive cerebrospinal fluid findings (raised IgG- index and/or positive oligoclonal bands)(n=263)</b>                                                            |                              |                |                              |                |
| Negative for anti-MOG, negative for anti-MBP                                                                                                                                       | 1.00                         |                | 1.00                         |                |
| Negative for anti-MOG, positive for anti-MBP                                                                                                                                       | 0.40 (0.16–0.99)             | 0.05           | 0.88 (0.47–1.66)             | 0.69           |
| Positive for anti-MOG, negative for anti-MBP                                                                                                                                       | 0.67 (0.40–1.13)             | 0.13           | 1.53 (0.87–2.69)             | 0.14           |
| Positive for anti-MOG, positive for anti-MBP                                                                                                                                       | 0.67 (0.37–1.21)             | 0.19           | 1.00 (0.35–2.88)             | 1.00           |
| <b>Patients treated with placebo (n=173)</b>                                                                                                                                       |                              |                |                              |                |
| Negative for anti-MOG, negative for anti-MBP                                                                                                                                       | 1.00                         |                | 1.00                         |                |
| Negative for anti-MOG, positive for anti-MBP                                                                                                                                       | 0.64 (0.27–1.55)             | 0.32           | 1.46 (0.72–2.94)             | 0.29           |
| Positive for anti-MOG, negative for anti-MBP                                                                                                                                       | 0.57 (0.31–1.03)             | 0.06           | 1.31 (0.71–2.40)             | 0.39           |
| Positive for anti-MOG, positive for anti-MBP                                                                                                                                       | 1.01 (0.55–1.86)             | 0.96           | 1.04 (0.31–3.47)             | 0.95           |
| <b>Patients treated with IFNB-1b (n=289)</b>                                                                                                                                       |                              |                |                              |                |

|                                                                          |                  |      |                  |      |
|--------------------------------------------------------------------------|------------------|------|------------------|------|
| Negative for anti-MOG, negative for anti-MBP                             | 1.00             |      | 1.00             |      |
| Negative for anti-MOG, positive for anti-MBP                             | 0.83 (0.37–1.86) | 0.64 | 1.14 (0.89–1.47) | 0.30 |
| Positive for anti-MOG, negative for anti-MBP                             | 0.58 (0.31–1.08) | 0.08 | 1.11 (0.77–1.62) | 0.57 |
| Positive for anti-MOG, positive for anti-MBP                             | 0.91 (0.46–1.82) | 0.81 | 1.01 (0.81–1.25) | 0.94 |
| <b>Patients who received steroids for the first event (n=327)</b>        |                  |      |                  |      |
| Negative for anti-MOG, negative for anti-MBP                             | 1.00             |      | 1.00             |      |
| Negative for anti-MOG, positive for anti-MBP                             | 1.06 (0.86–1.32) | 0.57 | 0.72 (0.37–1.40) | 0.33 |
| Positive for anti-MOG, negative for anti-MBP                             | 1.18 (0.94–1.48) | 0.17 | 0.93 (0.56–1.56) | 0.79 |
| Positive for anti-MOG, positive for anti-MBP                             | 1.02 (0.89–1.16) | 0.81 | 0.97 (0.39–2.46) | 0.96 |
| <b>Patients who did not receive steroids for the first event (n=135)</b> |                  |      |                  |      |
| Negative for anti-MOG, negative for anti-MBP                             | 1.00             |      | 1.00             |      |
| Negative for anti-MOG, positive for anti-MBP                             | 0.31 (0.04–2.41) | 0.26 | 1.69 (0.68–4.22) | 0.26 |
| Positive for anti-MOG, negative for anti-MBP                             | 0.35 (0.11–1.07) | 0.07 | 1.29 (0.40–4.14) | 0.67 |
| Positive for anti-MOG, positive for anti-MBP                             | 1.30 (0.53–3.20) | 0.56 | 1.21 (0.40–3.67) | 0.74 |
| <b>Patients with samples obtained ≤46 days after</b>                     |                  |      |                  |      |

|                                                                                |                  |      |                  |      |
|--------------------------------------------------------------------------------|------------------|------|------------------|------|
| <b>disease onset (n=110)</b>                                                   |                  |      |                  |      |
| Negative for anti-MOG, negative for anti-MBP                                   | 1.00             |      | 1.00             |      |
| Negative for anti-MOG, positive for anti-MBP                                   | 0.62 (0.18–2.16) | 0.46 | 1.10 (0.36–3.34) | 0.87 |
| Positive for anti-MOG, negative for anti-MBP                                   | 0.65 (0.27–1.58) | 0.34 | 0.43 (0.13–1.47) | 0.18 |
| Positive for anti-MOG, positive for anti-MBP                                   | 0.41 (0.14–1.26) | 0.12 | --†              |      |
| <b>Patients with samples obtained 46 – 54 days after disease onset (n=109)</b> |                  |      |                  |      |
| Negative for anti-MOG, negative for anti-MBP                                   | 1.00             |      | 1.00             |      |
| Negative for anti-MOG, positive for anti-MBP                                   | 1.85 (0.39–8.79) | 0.44 | 1.06 (0.35–3.19) | 0.92 |
| Positive for anti-MOG, negative for anti-MBP                                   | 0.65 (0.23–1.86) | 0.43 | 0.94 (0.30–3.00) | 0.92 |
| Positive for anti-MOG, positive for anti-MBP                                   | 1.72 (0.68–4.33) | 0.25 | 0.56 (0.7–4.33)  | 0.58 |
| <b>Patients with samples obtained 55 – 58 days after disease onset (n=119)</b> |                  |      |                  |      |
| Negative for anti-MOG, negative for anti-MBP                                   | 1.00             |      | 1.00             |      |
| Negative for anti-MOG, positive for anti-MBP                                   | 0.86 (0.31–2.37) | 0.77 | 0.89 (0.33–2.43) | 0.82 |
| Positive for anti-MOG, negative for anti-MBP                                   | 0.42 (0.17–1.01) | 0.05 | 0.72 (0.25–2.08) | 0.54 |
| Positive for anti-MOG, positive for anti-MBP                                   | 0.94 (0.34–2.58) | 0.90 | 1.01 (0.27–3.70) | 0.99 |
| <b>Patients with samples obtained ≥59 days after disease onset (n=124)</b>     |                  |      |                  |      |

|                                              |                  |      |                  |      |
|----------------------------------------------|------------------|------|------------------|------|
| Negative for anti-MOG, negative for anti-MBP | 1.00             |      | 1.00             |      |
| Negative for anti-MOG, positive for anti-MBP | 0.17 (0.02–1.29) | 0.09 | 1.35 (0.47–3.87) | 0.58 |
| Positive for anti-MOG, negative for anti-MBP | 0.82 (0.36–1.88) | 0.64 | 1.70 (0.81–3.57) | 0.16 |
| Positive for anti-MOG, positive for anti-MBP | 1.19 (0.52–2.74) | 0.68 | 1.74 (0.63–4.77) | 0.29 |

\*Hazard ratios were calculated with the final Cox proportional-hazards model. Cox proportional hazard models were adjusted for age, sex, IFNB-1b treatment (not in the placebo and the IFNB-1b subgroups), steroid treatment of the first event (not in the subgroups related to steroid treatment), multifocal presentation, number of lesions on T2-weighted MRI scan (per lesion) and number of gadolinium-enhancing MRI lesions (per lesion).

MOG denotes myelin oligodendrocyte glycoprotein, MBP myelin basic protein, and MRI magnetic resonance imaging.

†Only one patient was positive for anti-MOG and anti-MBP IgG.
